# Supplementary material for: Intervention Efficacy of Slightly Processed Allergen/Meat in Oral Immunotherapy for Seafood Allergy: A Systematic Review, Meta-Analysis, and Meta-Regression Analysis in Mouse Models and Clinical Patients
Source: MDPI journal article supplement (doi:10.3390/nu16050667), 2024-02-27
Supplement: s1 [file s1]

**Supplementary Table S1.** Quality assessments for five case-control studies in mouse models and 11 cohort/case report studies in clinical patients.

| Study                                  | Selection | Comparability | Exposure/<br>Outcome <sup>a</sup> | Total score | Quality<br>level |
|----------------------------------------|-----------|---------------|-----------------------------------|-------------|------------------|
| <i>5 studies in mouse model</i>        |           |               |                                   |             |                  |
| Han et al.(2018)                       | 4         | 2             | 2                                 | 8           | High             |
| Han et al.(2022)                       | 4         | 2             | 2                                 | 8           | High             |
| Fei et al.(2016)                       | 4         | 2             | 2                                 | 8           | High             |
| Wai et al.(2016)                       | 4         | 2             | 2                                 | 8           | High             |
| Leung et al.(2017)                     | 4         | 2             | 2                                 | 8           | High             |
| <i>11 studies in clinical patients</i> |           |               |                                   |             |                  |
| Nguyen et al.(2022)                    | 2         | 0             | 3                                 | 5           | Moderate         |
| Ugajin et al.(2021)                    | 2         | 0             | 3                                 | 5           | Moderate         |
| Porcaro et al.(2016)                   | 2         | 0             | 3                                 | 5           | Moderate         |
| Nucera et al.(2018)                    | 2         | 0             | 3                                 | 5           | Moderate         |
| Nakajima et al.(2015)                  | 2         | 0             | 3                                 | 5           | Moderate         |
| Damelio et al.(2015)                   | 2         | 0             | 3                                 | 5           | Moderate         |
| Elbadawy et al.(2017)                  | 3         | 2             | 3                                 | 8           | High             |
| D'Amelio et al.(2017)                  | 2         | 0             | 3                                 | 5           | Moderate         |
| Casimir et al.(1997)                   | 2         | 0             | 3                                 | 5           | Moderate         |
| Martorell-Calatayud et al.<br>(2019)   | 2         | 0             | 3                                 | 5           | Moderate         |
| Patriarca et al.(2007)                 | 2         | 0             | 3                                 | 5           | Moderate         |

<sup>a</sup> Exposure/outcome: Three items in exposure were applied in mouse models; three items in outcome were applied in clinical patients.

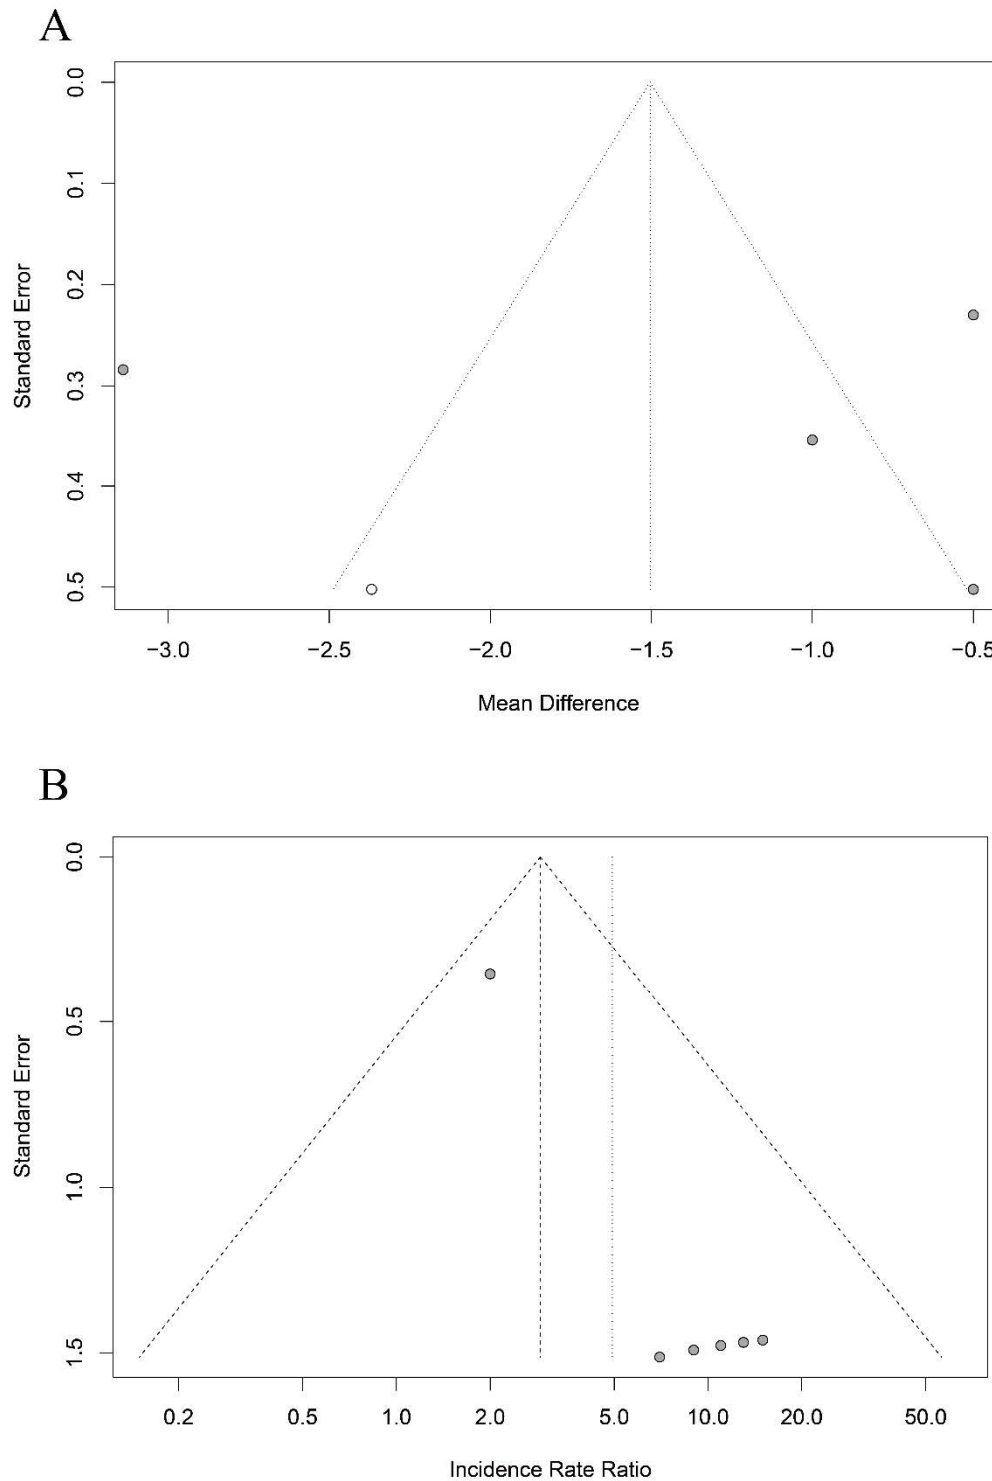

**Supplementary Figure S1.** Funnel plots for evaluating publication bias for intervention efficacy of processed allergen/meat from fish and crustacea on OIT. (A) Trim and filled methods for included case-control studies in mouse models. Note: Leung *et al.* (2017) study was excluded from publication bias analysis as the standard deviation of anaphylactic score after OIT treatment is zero. (B) Included cohort studies in clinical patients.
